# Supplementary material
Source: PubMed Central journal article supplement (PMC2810087)
Supplement: JCI40568sd.pdf [file JCI40568sd.pdf]

## Supplementary Tables

**Supplementary Table 1:** Effects of 50ng/ml mOSM on mRNA levels of key genes in Kusa 4b10 cells cultured for 17 days in osteoblast differentiation medium. Data are mean ratios of the gene of interest to HPRT1  $\pm$  SEM from 3 independent experiments (triplicate wells); \*,  $p < 0.05$ , \*\*,  $p < 0.01$ , \*\*\*,  $p < 0.001$  vs time-matched control (Ctrl).

| Ratio:HPRT1               |      | 0.5h                | 1h                   | 2h                   | 4h                  |
|---------------------------|------|---------------------|----------------------|----------------------|---------------------|
| PPAR $\gamma$             | Ctrl | 0.823 $\pm$ 0.292   | 0.647 $\pm$ 0.073    | 0.716 $\pm$ 0.203    | 0.450 $\pm$ 0.152   |
|                           | mOSM | 0.804 $\pm$ 0.112   | 0.819 $\pm$ 0.093    | 0.393 $\pm$ 0.061    | 0.218 $\pm$ 0.028   |
| C/EBP $\alpha$            | Ctrl | 0.121 $\pm$ 0.031   | 0.079 $\pm$ 0.010    | 0.117 $\pm$ 0.035    | 0.096 $\pm$ 0.019   |
|                           | mOSM | 0.092 $\pm$ 0.018   | 0.067 $\pm$ 0.016    | 0.055 $\pm$ 0.014    | 0.053 $\pm$ 0.024   |
| C/EBP $\beta$             | Ctrl | 0.067 $\pm$ 0.011   | 0.066 $\pm$ 0.017    | 0.053 $\pm$ 0.011    | 0.032 $\pm$ 0.004   |
|                           | mOSM | 0.084 $\pm$ 0.015   | 0.124 $\pm$ 0.022*   | 0.139 $\pm$ 0.009**  | 0.133 $\pm$ 0.049*  |
| C/EBP $\delta$            | Ctrl | 0.036 $\pm$ 0.012   | 0.027 $\pm$ 0.001    | 0.048 $\pm$ 0.009    | 0.017 $\pm$ 0.001   |
|                           | mOSM | 0.357 $\pm$ 0.109*  | 0.521 $\pm$ 0.053*** | 0.154 $\pm$ 0.026*   | 0.154 $\pm$ 0.060*  |
| RANKL                     | Ctrl | 1.87 $\pm$ 0.85     | 3.45 $\pm$ 1.22      | 1.93 $\pm$ 0.45      | 2.03 $\pm$ 1.09     |
|                           | mOSM | 3.67 $\pm$ 2.74     | 5.13 $\pm$ 1.13      | 5.62 $\pm$ 3.42      | 18.77 $\pm$ 0.52*** |
| IL-6                      | Ctrl | 0.010 $\pm$ 0.004   | 0.028 $\pm$ 0.017    | 0.018 $\pm$ 0.007    | 0.009 $\pm$ 0.006   |
|                           | mOSM | 0.286 $\pm$ 0.038** | 1.584 $\pm$ 0.135*** | 1.732 $\pm$ 0.194*** | 1.497 $\pm$ 0.192** |
| SOST ( $\times 10^{-3}$ ) | Ctrl | 0.39 $\pm$ 0.23     | 0.68 $\pm$ 0.39      | 0.39 $\pm$ 0.25      | 0.17 $\pm$ 0.15     |
|                           | mOSM | 0.12 $\pm$ 0.13     | 0.34 $\pm$ 0.17      | 0.041 $\pm$ 0.033*   | 0.006 $\pm$ 0.0003* |

**Supplementary Table 2:** Altered femoral cortical bone and vertebral bone in adult *Osmr*<sup>-/-</sup> mice. Values are mean ± SEM. For vertebral samples n=5-6 per group. For femoral samples n=7-8 per group; \*, p<0.05, \*\*, p<0.01; \*\*\*, p<0.001 vs sex-matched wild type (WT).

|                                                          | Male      |                            | Female    |                            |
|----------------------------------------------------------|-----------|----------------------------|-----------|----------------------------|
|                                                          | WT        | <i>Osmr</i> <sup>-/-</sup> | WT        | <i>Osmr</i> <sup>-/-</sup> |
| Femoral metaphyseal<br>Cortical Thickness (μm)           | 110±7     | 147±5***                   | 186±5     | 198±4*                     |
| Femoral metaphyseal<br>Periosteal Circumference (mm)     | 6.55±0.06 | 6.74±0.07*                 | 6.06±0.06 | 6.53±0.17*                 |
| Femoral diaphyseal<br>Cortical BMD (mg/mm <sup>3</sup> ) | 1098±6    | 1136±11**                  | 1118±4    | 1142±7**                   |
| Vertebral BV/TV (%)                                      | 9.42±0.87 | 14.3±1.49*                 | 8.42±0.71 | 17.77±5.26*                |
| Vertebral MAR (μm/day)                                   | 1.11±0.04 | 1.01±0.02*                 | 1.83±0.09 | 1.38±0.11**                |
| Vertebral MS/BS (%)                                      | 11.7±3.1  | 6.8±1.4                    | 26.4±3.4  | 18.4±2.1*                  |
| Vertebral (BFR/BS) (mm <sup>3</sup> /mm <sup>2</sup> /y) | 52±17     | 26±18                      | 175±25    | 90±7**                     |

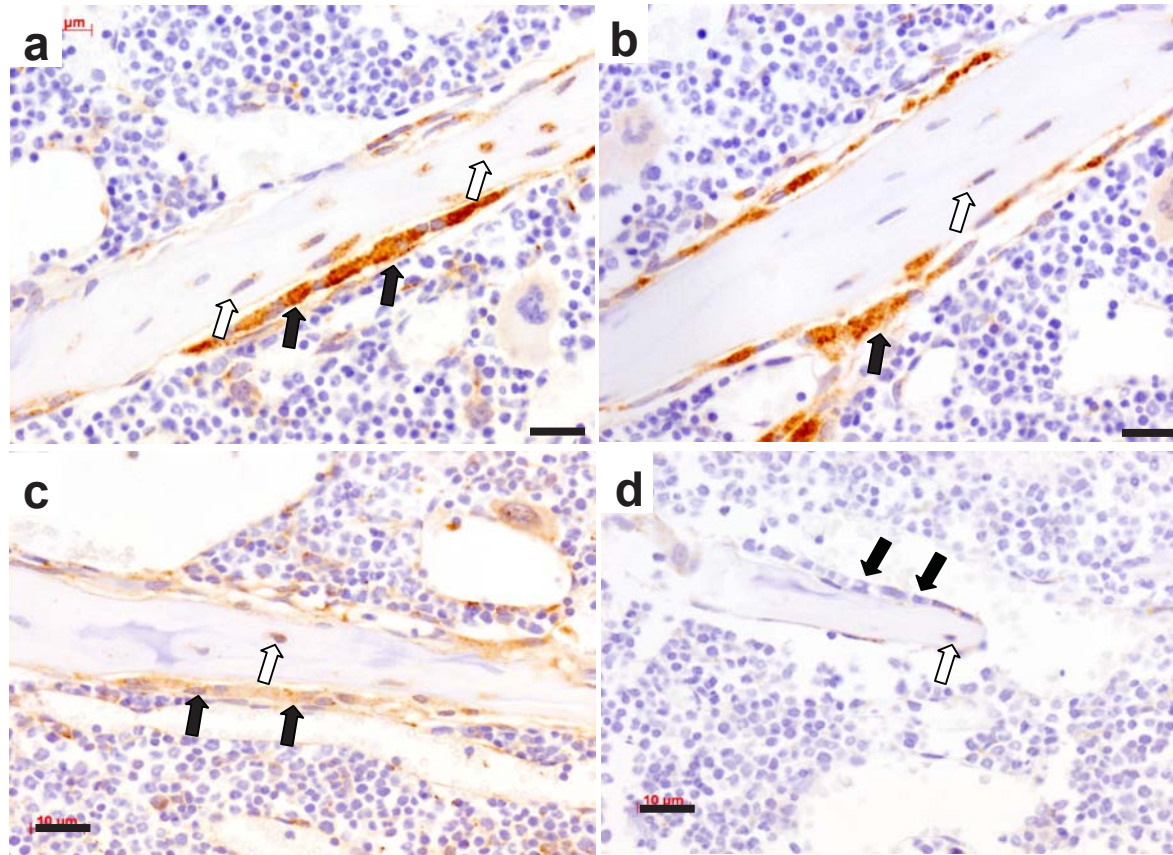

**Supplementary Figure 1:** OSM (a,b) and OSMR (c,d) immunohistochemistry in wild type (a,c) and *Osmr*<sup>-/-</sup> (b,d) bones. Positive staining for OSM is present in osteoblasts (black arrows), osteocytes (white arrows) and bone lining cells in both wild type and *Osmr*<sup>-/-</sup> samples. OSMR is only present in wild type osteoblasts, osteocytes, bone lining cells, endothelial cells and some marrow cells (c), but was not present in *Osmr*<sup>-/-</sup> (d). Scale bar = 10μm.
